# Supplementary material
Source: PubMed Central journal article supplement (PMC2605016)
Supplement: NIHMS69688-supplement-01.pdf [file NIHMS69688-supplement-01.pdf]

## Supplemental Data

## Noncanonical Binding of Calmodulin to Aquaporin-0:

## Implications for Channel Regulation

Steve L. Reichow and Tamir Gonen

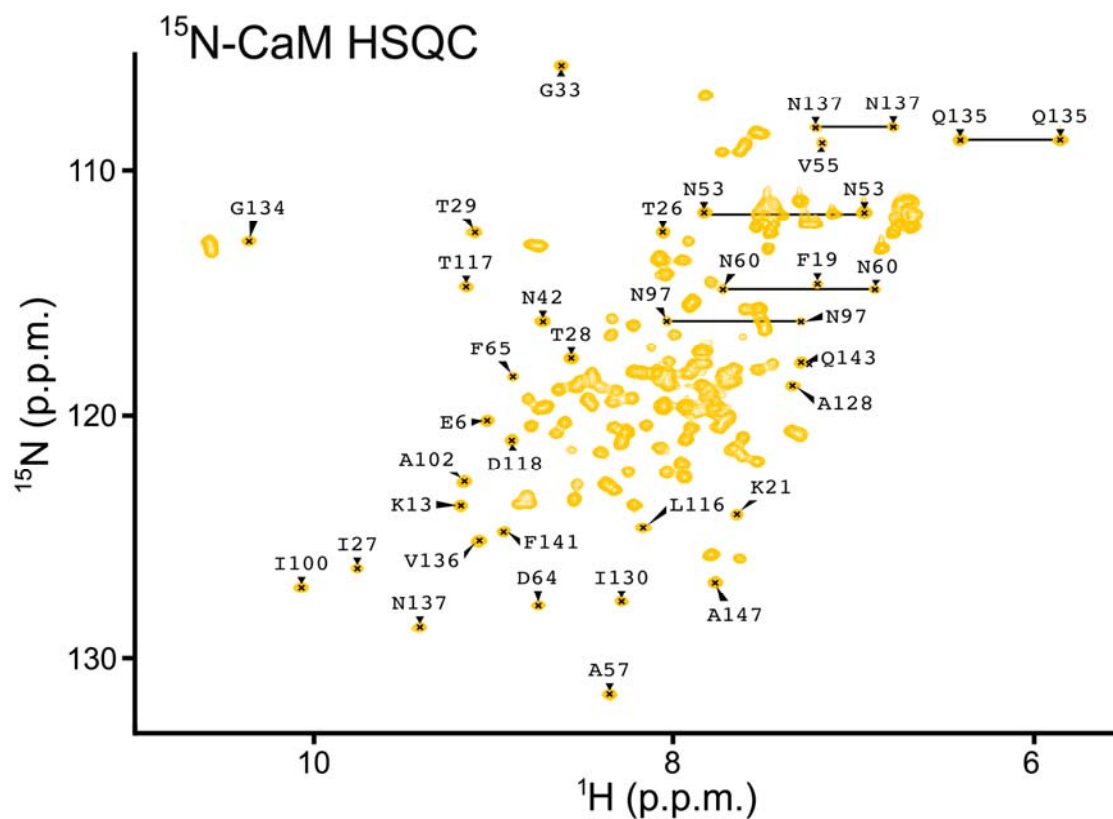**Figure S1.  $^{15}\text{N}$ -Calmodulin HSQC**

A reference heteronuclear single quantum coherence (HSQC) spectrum was recorded for the  $^{15}\text{N}$ -CaM and chemical shifts were assigned for well-resolved resonances by matching them to previously published results obtained under similar conditions (Biomagnetic Research Data Bank accession number 547 [Ikura et al., 1990]).
